# Supplementary material for: Hetero-metal hydroxide nanostrand assisted synthesis of MIL-110 nanorod arrays on porous substrate
Source: Royal Society of Chemistry journal article supplement (doi:10.1039/c3ce40696b), 2013-01-01
Supplement: c3ce40696b.pdf [file c3ce40696b.pdf]

## Supporting Information

# Hetero-Metal Hydroxide Nanostrand Assisted Synthesis of MIL-110 Nanorod Arrays on Porous Substrate

Yiyin Mao,<sup>a</sup> Hubiao Huang,<sup>a</sup> Yu Liu,<sup>a</sup> Li shi,<sup>a</sup> Wei Cao,<sup>a</sup> Junwei Li,<sup>a</sup> Luwei Sun,<sup>a</sup>  
Xinsheng Peng<sup>a,b\*</sup>

<sup>a</sup>State Key Laboratory of Silicon Materials, Department of Materials Science and Engineering,  
Zhejiang University, Hangzhou, 310027, P. R. China.

<sup>b</sup>Cyrus Tang Center for Sensor Materials and Application, Department of Materials Science and  
Engineering, Zhejiang University, Hangzhou, 310027, P. R. China.

### 1.Experimental Section:

*Materials:* Copper nitrate ( $\text{Cu}(\text{NO}_3)_2 \cdot 3\text{H}_2\text{O}$ ), zinc nitrate ( $\text{Zn}(\text{NO}_3)_2 \cdot 6\text{H}_2\text{O}$ ), cadmium nitrate ( $\text{Cd}(\text{NO}_3)_2 \cdot 4\text{H}_2\text{O}$ ), aluminium nitrate ( $\text{Al}(\text{NO}_3)_3 \cdot 9\text{H}_2\text{O}$ ), 2-aminoethanol ( $\text{NH}_2\text{-CH}_2\text{CH}_2\text{OH}$ ), were purchased from Acros Chemicals. 1,3,5-benzenetricarboxylic acid (trimesic acid,  $\text{H}_3\text{BTC}$ ) was purchased from Sigma-Aldrich. The supports were porous Anopore alumina membranes (Whatman) with an average pore size of ca.200 nm. Ultrapure water of 18.2 M $\Omega$  produced by a Millipore direct-Q system was used throughout the experiments.

*MIL-110 nanorod arrays synthesis:* Typically, the MIL-110 nanorod arrays were prepared including the formation of CHNs mesoporous thin films by filtering 15, 30 and 60 ml CHNs solution on a porous alumina membrane surface with effective area of 2.83 cm<sup>2</sup>, respectively. The obtained CHNs thin films were then placed face-up on the bottom of an autoclave with 30 ml, 1 mM  $\text{H}_3\text{BTC}$  deionized water solution and heated at 120°C for 3, 6, 9 and 24 h. After that, the autoclave was cooled to room temperature with a cooling rate of 10°C h<sup>-1</sup>. The obtained samples were washed with abundant deionized water for several times and then treated at 40°C in an oven to prevent the appearance of cracks caused by the release of interface stress.<sup>1</sup>

*Characterization:* The phases of the as-prepared products were characterized by XRD at room temperature using an X'Pert PRO (PANalytical, Netherlands) instrument with

Cu K $\alpha$  radiation. The morphologies and structures were characterized by using scanning electronic microscopy (SEM) (Hitachi S-4800), and TEM (Tecnai G2 F20 S-TWIN). SEM observation was conducted after coating a 2 nm thick platinum 30 layer by using a Hitachi e-1030 ion sputter at the pressure of 10 Pa and the current density of 10 mA. The metal ion concentration was determined by an ICP-AES (IRIS INTREPID II XSP, American). XPS spectra were recorded by using VG ESCALAB MARK II with Mg Ka: 1253.6 eV and Step of 0.2 eV.

## 2. CHNs thin films

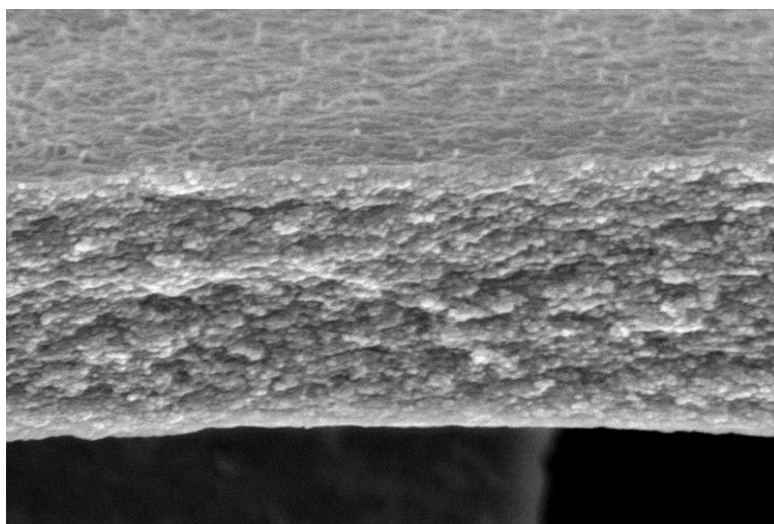

**Figure S1.** Cross-section SEM image of the CHNs thin films filtered from 30 ml CHNs solution on PC membrane with effective diameter of 1.9 cm.

### 3.XPS spectrum of MIL-110 nanorod arrays

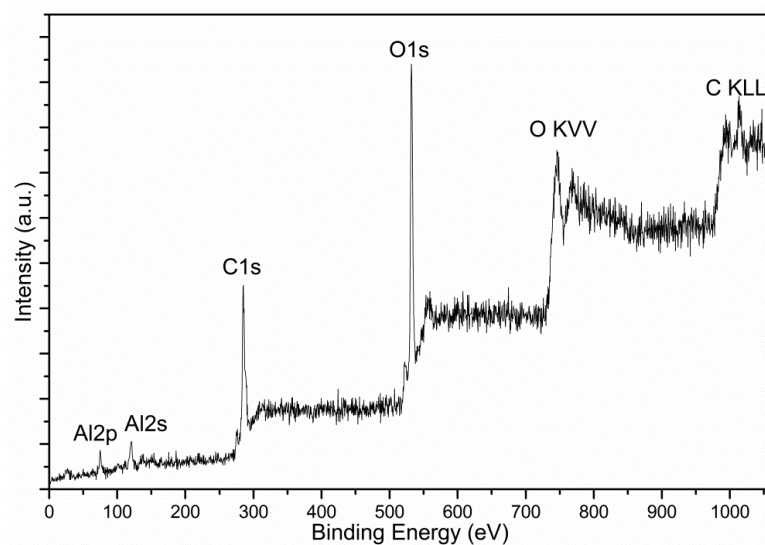

**Figure S2.** XPS spectrum of MIL-110 nanorod arrays as shown in Figure 1b.

### 4. X-ray Energy dispersive analysis spectra (EDS) of the samples reacting with different time

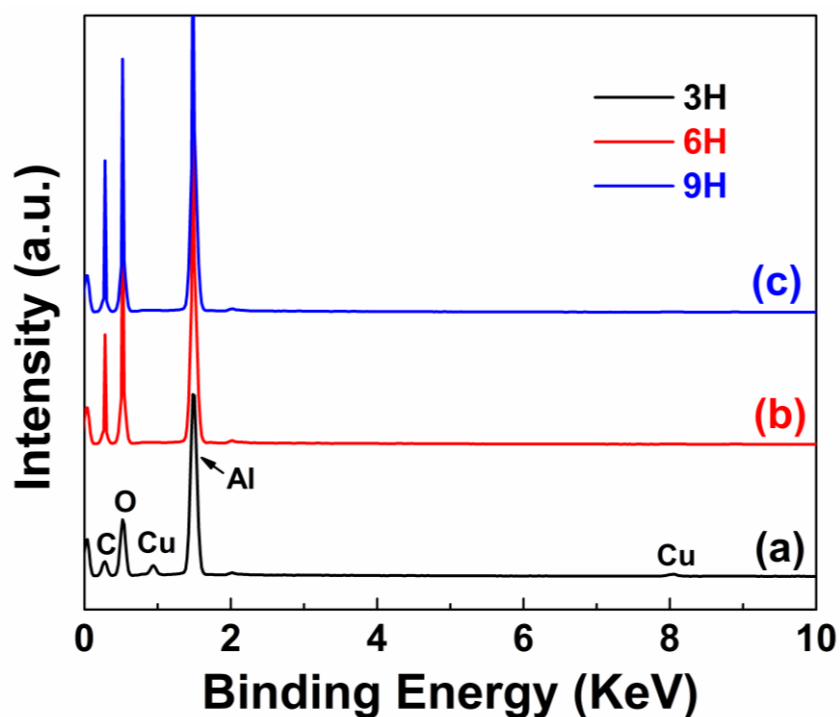

**Figure S3.** X-ray Energy dispersive analysis spectra of the samples prepared by putting CHNs thin films filtered from 30ml CHNs solution in 30 ml, 1mM H<sub>3</sub>BTC aqueous solution at 120°C for (a) 3 h, (b) 6 h, (c) 9 h, respectively.

## 5. The samples prepared in different solvents

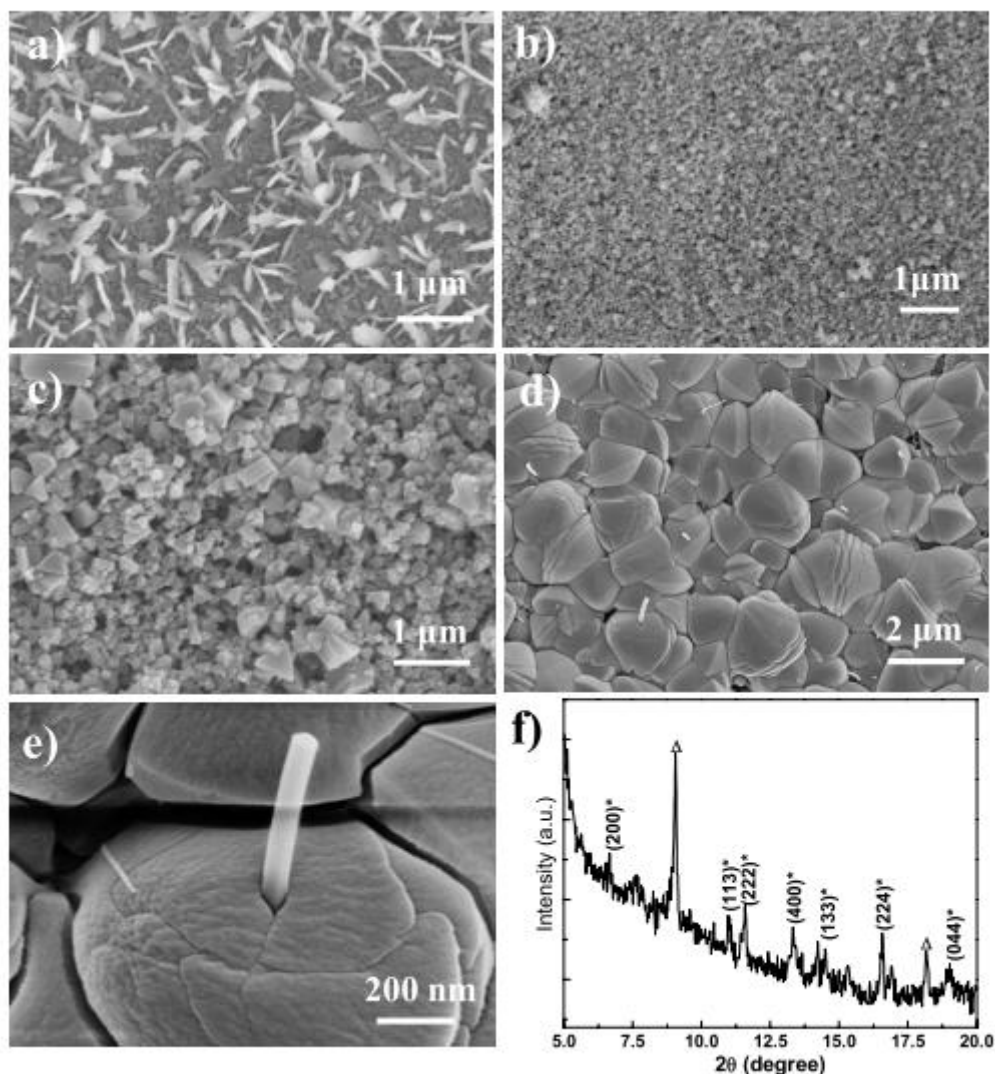

**Figure S4.** the SEM images of the samples prepared in 30 ml, 1mM H<sub>3</sub>BTC (a) octanol, (b) DMF, (c) ethanol solutions; (d-e) 8 mM H<sub>3</sub>BTC water/ethanol (volume ratio of 1:1) solution, respectively. CHNs filtered from 30 ml CHNs solution were used and kept at 120 °C for 24 hours for all the samples. (f) XRD recorded from (d) the peaks marked as star (\*) are belonged to HKUST-1 phase. The peaks marked as triangle (Δ) are assigned to [Cu<sub>2</sub>(OH)(BTC)(H<sub>2</sub>O)]·2nH<sub>2</sub>O. Due to the very less amount of the MIL-110 nanorods, no obviously XRD peaks of MIL-110 phase are observed.

## 6.EDS and XRD of the samples prepared by using zinc and cadmium hydroxide nanostrands

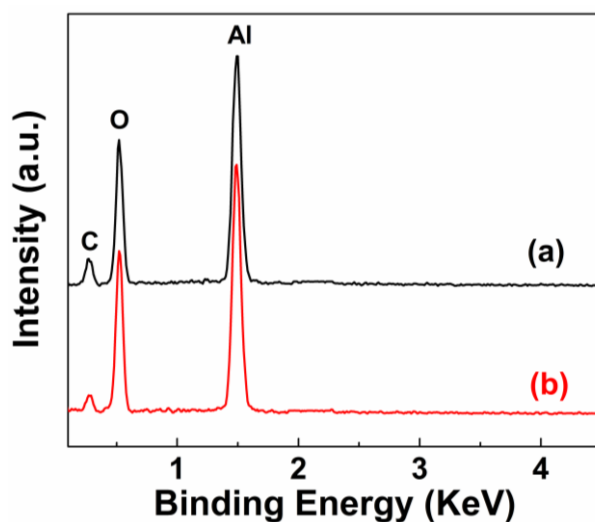

**Figure S5.** EDS of the samples prepared by putting thin films filtered from (a) 30ml cadmium hydroxide nanostrands , (b) 30ml zinc hydroxide in 30 ml, 1mM H<sub>3</sub>BTC aqueous solution at 120°C for 24h, respectively.

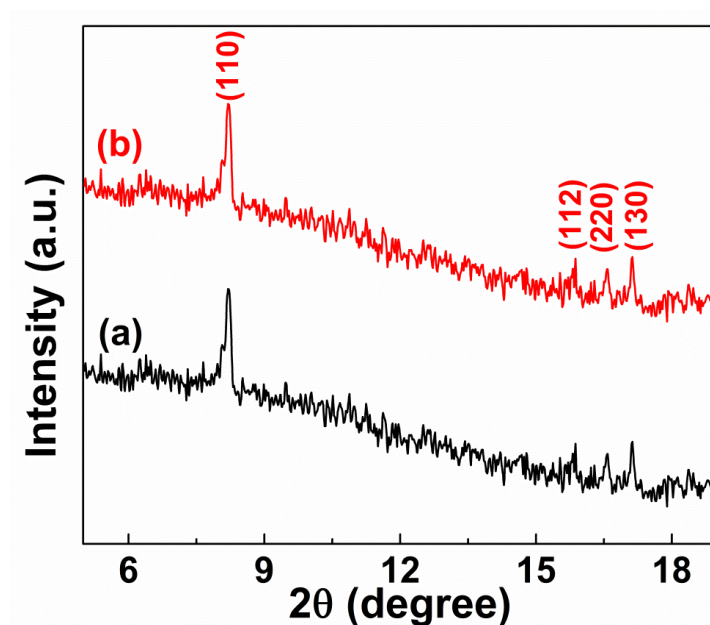

**Figure S6.** XRD of the samples prepared by putting thin films filtered from (a) 30ml cadmium hydroxide nanostrands , (b) 30ml zinc hydroxide in 30 ml, 1mM H<sub>3</sub>BTC aqueous solution at 120°C for 24h, respectively.

**Reference:**

- 1 J. Nan, X. Dong, W. Wang, W. Jin and N. Xu, *Langmuir* **2011**, 27, 4309-4312.
